# Supplementary material
Source: PubMed Central journal article supplement (PMC6182299)
Supplement: NIHMS961575-supplement-1.pdf [file NIHMS961575-supplement-1.pdf]

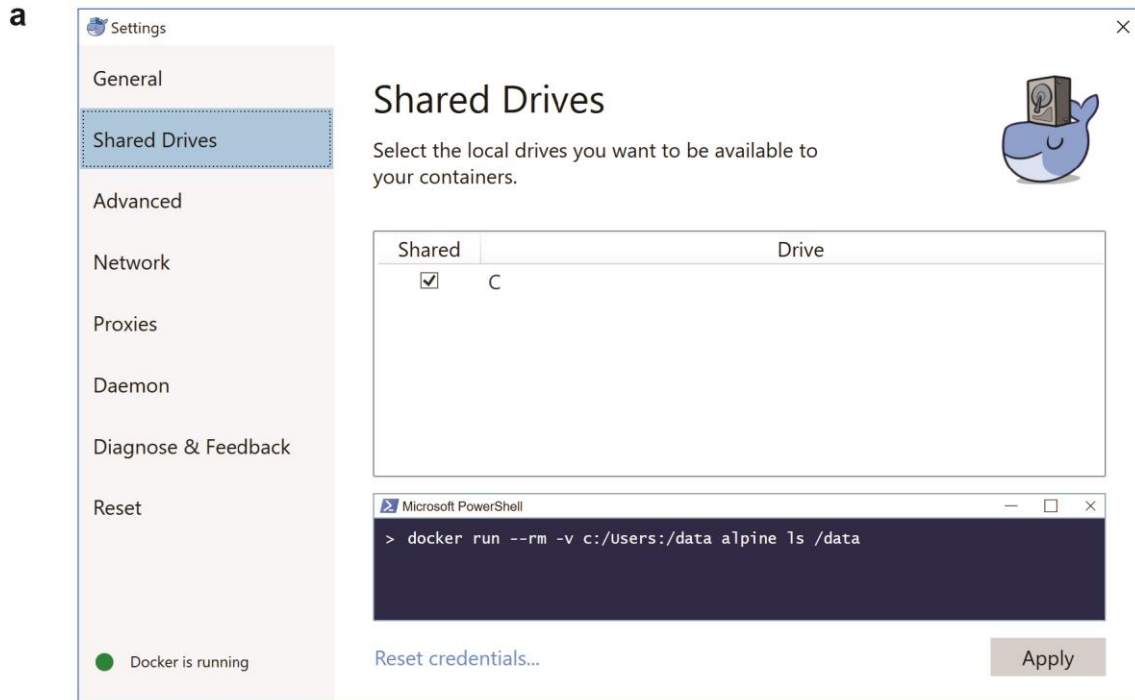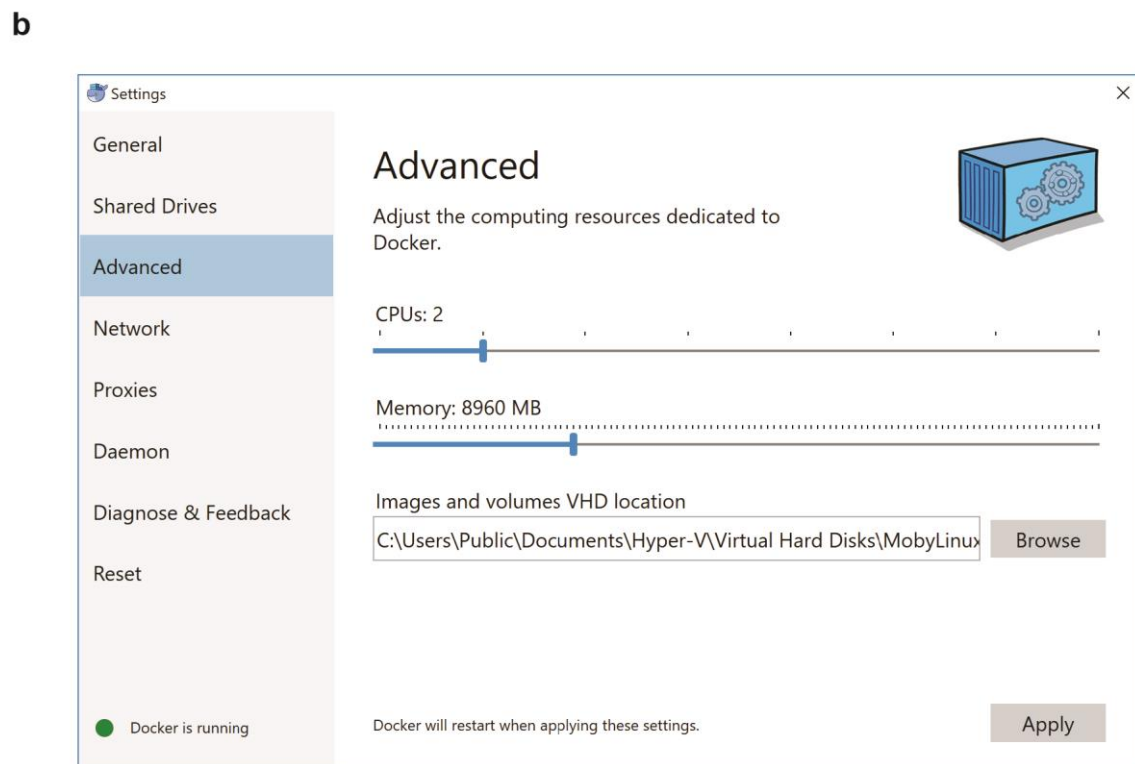

**Supplementary Figure 1**

**Screenshot of sharing disk volumes and allocating memory with Docker containers.**

**a**, Screenshot using Docker to ensure that the drive(s) you want to be available to the container is/are checked (under Settings.../ Shared Drives). **b**, Screenshot using Docker to allocate enough memory to the container (under Settings.../ Advanced).

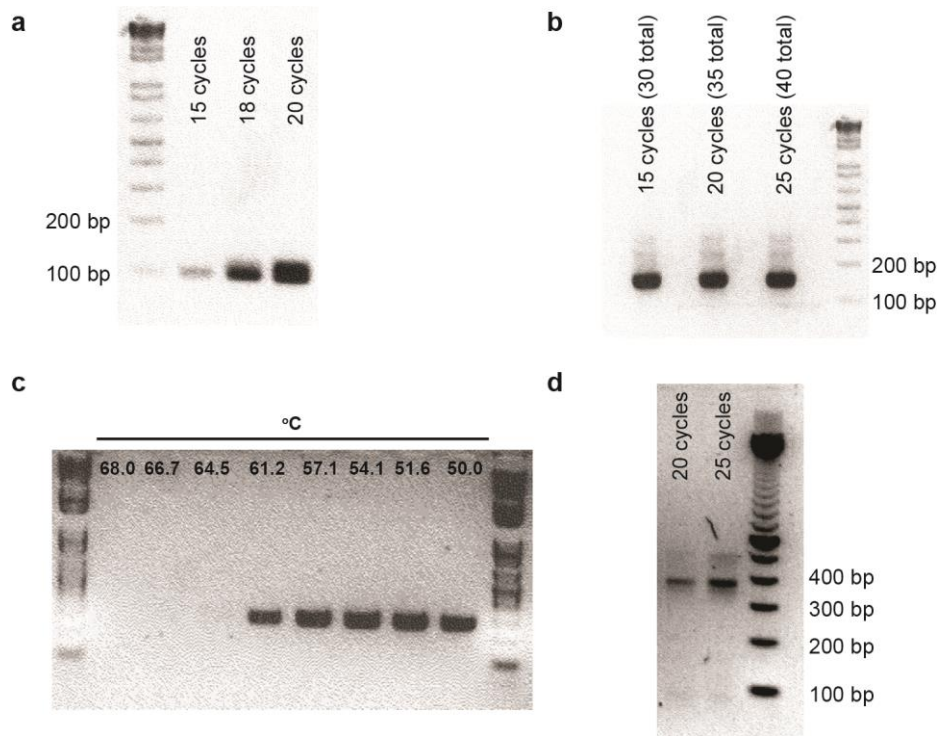

## Supplementary Figure 2

### Pooled sgRNA library preparation and analysis.

**a**, Representative results for IsPCR1. **b**, Representative results for IsPCR2. **c**, Gradient PCR for lentiGuide-Puro-specific primers or locus-specific primers for laPCR1. **d**, Representative results for laPCR2.

**a**

```
Site1 CACACTGTGGCCCCTGTGCCCAGCCCTGGGCTCTCTGTACATGAAGCAAC CCCTGTGCCCAGCCC NA NA
Site2 GTCCTGGTTTTTTGGTTTGGGAAATATAGTCATC NA GTCCTGGTTTTTTGGTTTAAAAAATATAGTCATC NA
Site3 TTTCTGGTTTTTTGGTTTGGGAAATATAGTCATC NA NA GGAAATATA
```

**b**

```
chr1 65118211 65118261 R1 CTACAGAGCCCCAGTCCTGG NA NA
chr6 51002798 51002820 R2 NA NA NA
```

### Supplementary Figure 3

#### Example amplicon and regions description files.

**a**, Example of a properly formatted amplicon description file. This file is a tab delimited text file with up to 5 columns (first 2 columns required). No column heading is required. **b**, Example of a properly formatted regions description file. This file is a tab delimited text file with up to 7 columns (4 required) and contains the coordinates of the regions to analyze and some additional information. No column heading is required.

**bold** Substitutions  
  Insertions  
 - Deletions  
 - - Predicted cleavage position

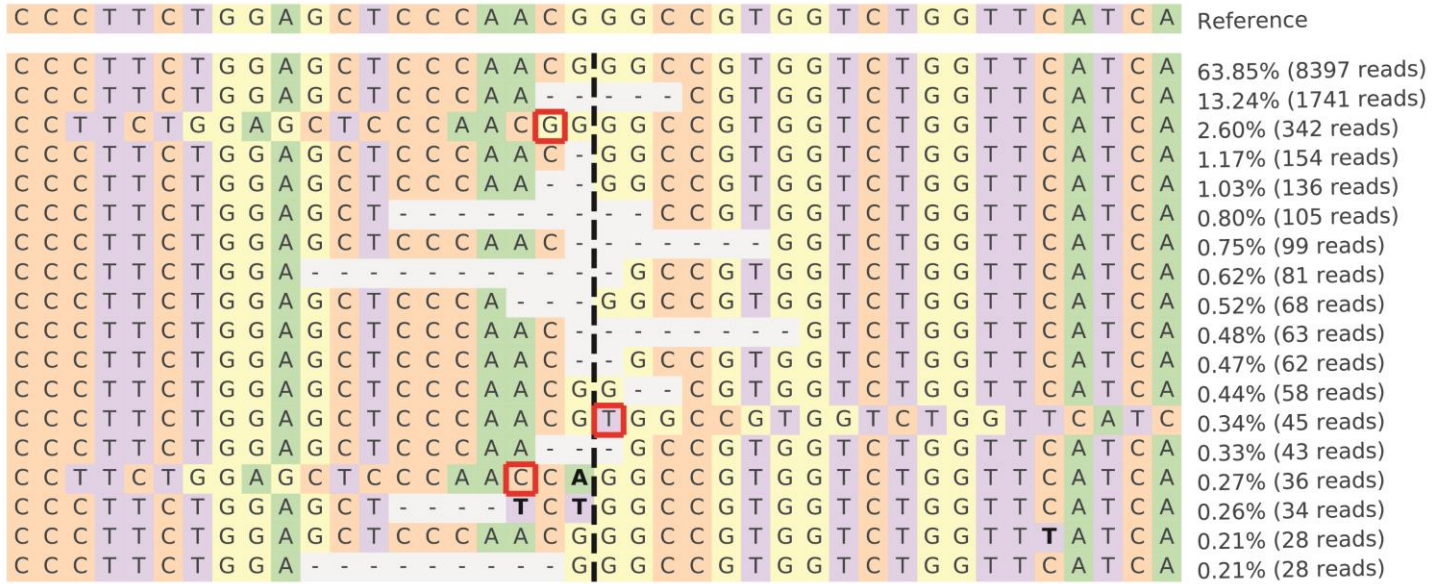

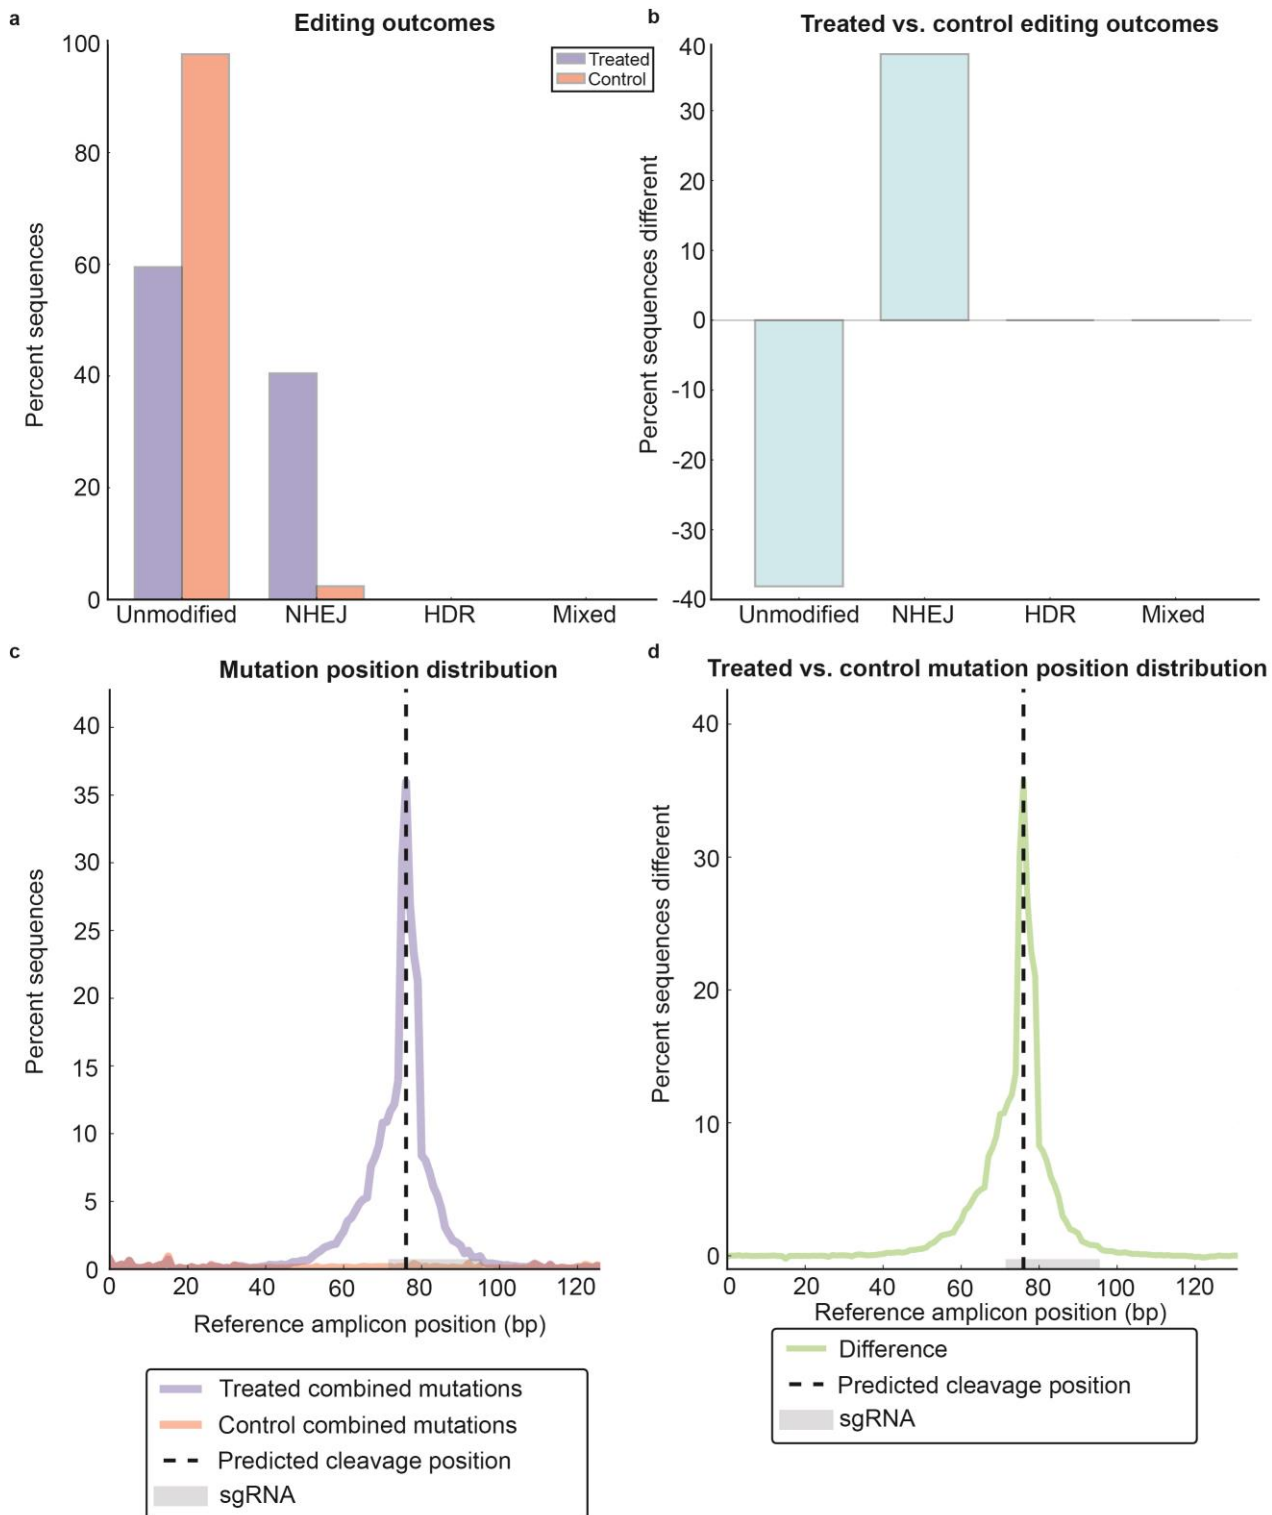

**Supplementary Figure 5**

**Direct comparison of *BCL11A* exon 2 sequence between a *BCL11A* exon 2 targeted sgRNA sample (“edited”) and a non-edited control sample (“non-edited”).**

**a**, Distribution of editing outcomes (unmodified, NHEJ, HDR, and mixed alleles) for treated (edited) and control (non-edited) samples. **b**, Comparison of the percent different editing outcomes (unmodified, NHEJ, HDR, and mixed alleles)

between the treated (edited) and control (non-edited) samples. **c**, Combined (substitutions/deletions/insertions) mutation position distribution for treated (edited) and control (non-edited) samples. The vertical dashed line indicates the position of predicted Cas9 cleavage. The position of the sgRNA is shown in gray. **d**, Comparison of the percent different combined mutations (substitutions/deletions/insertions) between the treated (edited) and control (non-edited) samples. The vertical dashed line indicates the position of predicted Cas9 cleavage. The position of the sgRNA is shown in gray.

## SUPPLEMENTARY TABLES

**Supplementary Table 1** | List of available PAM sequences for CRISPOR analysis. R = A or G; Y = C or T; V = A, C, or G; N = A, C, G or T

| Nuclease | Species                                                                                               | PAM      | PAM position | References |
|----------|-------------------------------------------------------------------------------------------------------|----------|--------------|------------|
| Cas9     | <i>Streptococcus pyogenes</i>                                                                         | NGG      | 3'           | 1,2        |
| Cas9     | <i>Streptococcus pyogenes</i> HF1/eSpCas9/HypaCas9                                                    | NGG      | 3'           | 81-83      |
| Cas9     | <i>Streptococcus pyogenes</i> VQR variant                                                             | NGA      | 3'           | 97         |
| Cas9     | <i>Streptococcus pyogenes</i> VREER variant                                                           | NGCG     | 3'           | 97         |
| Cas9     | <i>Staphylococcus aureus</i>                                                                          | NNGRRT   | 3'           | 98         |
| Cas9     | <i>Staphylococcus aureus</i> KKH variant                                                              | NNNRRT   | 3'           | 99         |
| Cas9     | <i>Streptococcus thermophilus</i> ST1                                                                 | NNAGAA   | 3'           | 100        |
| Cas9     | <i>Streptococcus thermophilus</i> A                                                                   | NGGNG    | 3'           | 101        |
| Cas9     | <i>Neisseria meningitidis</i>                                                                         | NNNNGATT | 3'           | 100        |
| Cas9     | <i>Campylobacter jejuni</i>                                                                           | NNNNACA  | 3'           | 101,102    |
| Cpf1     | <i>Acidaminococcus</i> sp. BV3L6; <i>Lachnospiraceae</i> bacterium ND2006                             | TTTV     | 5'           | 4          |
| Cpf1     | <i>Acidaminococcus</i> sp. BV3L6; <i>Lachnospiraceae</i> bacterium ND2006 variant (S542R/K607R)       | TYCV     | 5'           | 103        |
| Cpf1     | <i>Acidaminococcus</i> sp. BV3L6; <i>Lachnospiraceae</i> bacterium ND2006 variant (S542R/K548V/N552R) | TATV     | 5'           | 103        |

**Supplementary Table 2 |** Barcoding strategy for oligonucleotide pool synthesis. The sgRNA sequence is denoted with N's

| Barcode Number | Forward barcode (bold)           | Reverse barcode (dotted underline) | Homologous sequence upstream of sgRNA (italics) | Homologous sequence downstream of sgRNA (underline)                         | Full oligonucleotide sequence                                                                                                         |
|----------------|----------------------------------|------------------------------------|-------------------------------------------------|-----------------------------------------------------------------------------|---------------------------------------------------------------------------------------------------------------------------------------|
| 1              | <b>CGGGTTC<br/>CGT</b>           | <u>GCTTAGAA</u><br><u>TAGAA</u>    | <i>GGAAAGGAC</i><br><i>GAAACACCG</i>            | <u>GTTT</u> <u>TAGAGC</u><br><u>TAGAAATAGC</u><br><u>AAGTTAAAT</u><br>AAGGC | <b>CGGGTTC</b> <b>CGT</b> <i>GGAAAGGACGAAACACCG</i> NNNNNNNNNNNNNNNNNNNN<br>NNGTTTTAGAGCTAGAAATAGCAAGTTAAATAAAGGCCTTAGAAT<br>AGAA     |
| 2              | <b>GTTTATC<br/>GGGC</b>          | <u>ACTTACTG</u><br><u>TACC</u>     | <i>GGAAAGGAC</i><br><i>GAAACACCG</i>            | <u>GTTT</u> <u>TAGAGC</u><br><u>TAGAAATAGC</u><br><u>AAGTTAAAT</u><br>AAGGC | <b>GTTTATC</b> <b>GGGC</b> <i>GGAAAGGACGAAACACCG</i> NNNNNNNNNNNNNNNNNNNN<br>NNGTTTTAGAGCTAGAAATAGCAAGTTAAATAAAGGCCTTACTG<br>TACC     |
| 3              | <b>ACCGATG<br/>TTGAC</b>         | <u>CTCGTAAT</u><br><u>AGC</u>      | <i>GGAAAGGAC</i><br><i>GAAACACCG</i>            | <u>GTTT</u> <u>TAGAGC</u><br><u>TAGAAATAGC</u><br><u>AAGTTAAAT</u><br>AAGGC | <b>ACCGATG</b> <b>TTGAC</b> <i>GGAAAGGACGAAACACCG</i> NNNNNNNNNNNNNNNNNNNN<br>NNGTTTTAGAGCTAGAAATAGCAAGTTAAATAAAGGCCTCGTAA<br>TAGC    |
| 4              | <b>GAGGTCT<br/>TTCATGC</b>       | <u>GACAACAT</u><br><u>A</u>        | <i>GGAAAGGAC</i><br><i>GAAACACCG</i>            | <u>GTTT</u> <u>TAGAGC</u><br><u>TAGAAATAGC</u><br><u>AAGTTAAAT</u><br>AAGGC | <b>GAGGTCT</b> <b>TTCATGC</b> <i>GGAAAGGACGAAACACCG</i> NNNNNNNNNNNNNNNNNNNN<br>NNGTTTTAGAGCTAGAAATAGCAAGTTAAATAAAGGCCACAA<br>CATA    |
| 5              | <b>TATCCCG<br/>TGAAGCT</b>       | <u>TTCGGTTA</u><br><u>A</u>        | <i>GGAAAGGAC</i><br><i>GAAACACCG</i>            | <u>GTTT</u> <u>TAGAGC</u><br><u>TAGAAATAGC</u><br><u>AAGTTAAAT</u><br>AAGGC | <b>TATCCCG</b> <b>TGAAGCT</b> <i>GGAAAGGACGAAACACCG</i> NNNNNNNNNNNNNNNNNNNN<br>NNGTTTTAGAGCTAGAAATAGCAAGTTAAATAAAGGCCTTCGG<br>TTAA   |
| 6              | <b>TAGTAGT<br/>TCAGACG<br/>C</b> | <u>ATCTACCC</u>                    | <i>GGAAAGGAC</i><br><i>GAAACACCG</i>            | <u>GTTT</u> <u>TAGAGC</u><br><u>TAGAAATAGC</u><br><u>AAGTTAAAT</u><br>AAGGC | <b>TAGTAGT</b> <b>TCAGACG</b> <i>GGAAAGGACGAAACACCG</i> NNNNNNNNNNNNNNNNNNNN<br>NNGTTTTAGAGCTAGAAATAGCAAGTTAAATAAAGGCCTCT<br>ACCC     |
| 7              | <b>GGATGCA<br/>TGATCTA<br/>G</b> | <u>CATCAAGC</u>                    | <i>GGAAAGGAC</i><br><i>GAAACACCG</i>            | <u>GTTT</u> <u>TAGAGC</u><br><u>TAGAAATAGC</u><br><u>AAGTTAAAT</u><br>AAGGC | <b>GGATGCA</b> <b>TGATCTA</b> <i>GGAAAGGACGAAACACCG</i> NNNNNNNNNNNNNNNNNNNN<br>NNGTTTTAGAGCTAGAAATAGCAAGTTAAATAAAGGCCATC<br>AAGC     |
| 8              | <b>ATGAGGA<br/>CGAATCT</b>       | <u>CACCTAAA</u><br><u>G</u>        | <i>GGAAAGGAC</i><br><i>GAAACACCG</i>            | <u>GTTT</u> <u>TAGAGC</u><br><u>TAGAAATAGC</u><br><u>AAGTTAAAT</u><br>AAGGC | <b>ATGAGGA</b> <b>CGAATCT</b> <i>GGAAAGGACGAAACACCG</i> NNNNNNNNNNNNNNNNNNNN<br>NNGTTTTAGAGCTAGAAATAGCAAGTTAAATAAAGGCCACCT<br>AAAG    |
| 9              | <b>GGTAGGC<br/>ACG</b>           | <u>TAAACTTA</u><br><u>GAACC</u>    | <i>GGAAAGGAC</i><br><i>GAAACACCG</i>            | <u>GTTT</u> <u>TAGAGC</u><br><u>TAGAAATAGC</u><br><u>AAGTTAAAT</u><br>AAGGC | <b>GGTAGGC</b> <b>ACG</b> <i>GGAAAGGACGAAACACCG</i> NNNNNNNNNNNNNNNNNNNN<br>NNGTTTTAGAGCTAGAAATAGCAAGTTAAATAAAGGCTAAACTTAG<br>AACC    |
| 10             | <b>AGTCATG<br/>ATTCAG</b>        | <u>GTTGCAAG</u><br><u>TCTAG</u>    | <i>GGAAAGGAC</i><br><i>GAAACACCG</i>            | <u>GTTT</u> <u>TAGAGC</u><br><u>TAGAAATAGC</u><br><u>AAGTTAAAT</u><br>AAGGC | <b>AGTCATG</b> <b>ATTCAG</b> <i>GGAAAGGACGAAACACCG</i> NNNNNNNNNNNNNNNNNNNN<br>NNGTTTTAGAGCTAGAAATAGCAAGTTAAATAAAGGCCTTGCA<br>AGTCTAG |



**Supplementary Table 3 | Primers for IsPCR1 library preparation**

| <b>Primer</b> | <b>Sequence (5' to 3')</b>     |
|---------------|--------------------------------|
| Barcode1F     | CGGGTTCCGTGGAAAGG              |
| Barcode1R     | TTCTATTCTAAGCGCCTTATTTTAACTTGC |
| Barcode2F     | GTTTATCGGGCGGAAAGG             |
| Barcode2R     | GGTACAGTAAGTGCCTTATTTTAACTTGC  |
| Barcode3F     | ACCGATGTTGACGGAAAGG            |
| Barcode3R     | GCTATTACGAGGCCTTATTTTAACTTGC   |
| Barcode4F     | GAGGTCTTTCATGCGGAAAGG          |
| Barcode4R     | TATGTTGTGGCCTTATTTTAACTTGC     |
| Barcode5F     | TATCCCGTGAAGCTGGAAAGG          |
| Barcode5R     | TTAACCGAAGCCTTATTTTAACTTGC     |
| Barcode6F     | TAGTAGTTCAGACGCGGAAAGG         |
| Barcode6R     | GGGTACATGCCTTATTTTAACTTGC      |
| Barcode7F     | GGATGCATGATCTAGGGAAAGG         |
| Barcode7R     | GCTTGATGGCCTTATTTTAACTTGC      |
| Barcode8F     | ATGAGGACGAATCTGGAAAGG          |
| Barcode8R     | CTTTAGGTGGCCTTATTTTAACTTGC     |
| Barcode9F     | GGTAGGCACGGGAAAGG              |
| Barcode9R     | GGTTCTAAGTTTAGCCTTATTTTAACTTGC |
| Barcode10F    | AGTCATGATTCAGGGAAAGG           |
| Barcode10R    | CTAGACTTGCAACGCCTTATTTTAACTTGC |

**Supplementary Table 4** | Primers for IsPCR2 library preparation

| <b>Primer</b>  | <b>Sequence (5' to 3')</b>                                    |
|----------------|---------------------------------------------------------------|
| IsPCR2_forward | TAACTTGAAAGTATTTTCGATTTCTTGGCTTTATATATCTTGTGGAAAGGACGAAACACCG |
| IsPCR2_reverse | ACTTTTTCAAGTTGATAACGGACTAGCCTTATTTTAACTTGCTATTTCTAGCTCTAAAAC  |

**Supplementary Table 5** | Primers for laPCR1 for pLentiGuide-specific deep sequencing for sgRNA enumeration. Bold sequence is Illumina Nextera handle sequence. Underlined sequence is specific to the lentiGuide-Puro plasmid.

| Primer             | Sequence (5' to 3')                                                                         |
|--------------------|---------------------------------------------------------------------------------------------|
| lentiGuide_forward | <b>TCGTCGGCAGCGTC</b> AGATGTGTATAAGAGACAGAAATGGACTATCATATGCTTACCGTAACTTG<br>AAAGTATTTTCG    |
| lentiGuide_reverse | <b>GTCTCGTGGGCTCGG</b> AGATGTGTATAAGAGACAGCTTTAGTTTGTATGTCTGTTGCTATTATG<br>TCTACTATTCTTTCCC |

**Supplementary Table 6** | Primers for laPCR1 for locus-specific deep sequencing. Bold sequence is Illumina Nextera handle sequence. Recommend 20 bp of locus-specific sequence.

| <b>Primer</b> | <b>Sequence (5' to 3')</b>                                         |
|---------------|--------------------------------------------------------------------|
| Locus_forward | <b>TCGTCGGCAGCGTC</b> AGATGTGTATAAGAGACAG-Locus-Specific-Sequence  |
| Locus_reverse | <b>GTCTCGTGGGCTCGG</b> AGATGTGTATAAGAGACAG-Locus-Specific-Sequence |

**Supplementary Table 7 |** Illumina forward sequencing primers for laPCR2 (i5-Index-Handle)

| <b>Primer</b> | <b>Sequence (5' to 3')</b>                                  |
|---------------|-------------------------------------------------------------|
| F501          | <b>AATGATACGGCGACCACCGAGATCTACACTAGATCGCTCGTCGGCAGCGTC</b>  |
| F502          | <b>AATGATACGGCGACCACCGAGATCTACACCTCTCTATTCGTCGGCAGCGTC</b>  |
| F503          | <b>AATGATACGGCGACCACCGAGATCTACACTATCCTCTTCGTCGGCAGCGTC</b>  |
| F504          | <b>AATGATACGGCGACCACCGAGATCTACACAGAGTAGATCGTCGGCAGCGTC</b>  |
| F505          | <b>AATGATACGGCGACCACCGAGATCTACACGTAAGGAGTCGTCGGCAGCGTC</b>  |
| F506          | <b>AATGATACGGCGACCACCGAGATCTACACACTGCATATTCGTCGGCAGCGTC</b> |
| F507          | <b>AATGATACGGCGACCACCGAGATCTACACAAGGAGTATTCGTCGGCAGCGTC</b> |
| F508          | <b>AATGATACGGCGACCACCGAGATCTACACCTAAGCCTTCGTCGGCAGCGTC</b>  |
| F517          | <b>AATGATACGGCGACCACCGAGATCTACACGCGTAAGATTCGTCGGCAGCGTC</b> |

**Supplementary Table 8 | Illumina reverse sequencing primers for laPCR2 (i7-Index-Handle)**

| <b>Primer</b> | <b>Sequence (5' to 3')</b>                                      |
|---------------|-----------------------------------------------------------------|
| R701          | <b>CAAGCAGAAGACGGCATAACGAGAT</b> <u>TCGCCTTAGTCTCGTGGGCTCGG</u> |
| R702          | <b>CAAGCAGAAGACGGCATAACGAGAT</b> CTAGTACGGTCTCGTGGGCTCGG        |
| R703          | <b>CAAGCAGAAGACGGCATAACGAGAT</b> TTCTGCCTGTCTCGTGGGCTCGG        |
| R704          | <b>CAAGCAGAAGACGGCATAACGAGAT</b> GCTCAGGAGTCTCGTGGGCTCGG        |
| R705          | <b>CAAGCAGAAGACGGCATAACGAGAT</b> AGGAGTCCGTCTCGTGGGCTCGG        |
| R706          | <b>CAAGCAGAAGACGGCATAACGAGAT</b> CATGCCTAGTCTCGTGGGCTCGG        |
| R707          | <b>CAAGCAGAAGACGGCATAACGAGAT</b> GTAGAGAGGTCTCGTGGGCTCGG        |
| R708          | <b>CAAGCAGAAGACGGCATAACGAGAT</b> CCTCTCTGGTCTCGTGGGCTCGG        |
| R709          | <b>CAAGCAGAAGACGGCATAACGAGAT</b> AGCGTAGCGTCTCGTGGGCTCGG        |
| R710          | <b>CAAGCAGAAGACGGCATAACGAGAT</b> CAGCCTCGGTCTCGTGGGCTCGG        |
| R711          | <b>CAAGCAGAAGACGGCATAACGAGAT</b> TGCCTCTTGTCTCGTGGGCTCGG        |
| R712          | <b>CAAGCAGAAGACGGCATAACGAGAT</b> TCCTCTACGTCTCGTGGGCTCGG        |

### Supplementary References

97. Kleinstiver, B. P. *et al.* Engineered CRISPR-Cas9 nucleases with altered PAM specificities. *Nature* **523**, 481–485 (2015).
98. Ran, F. A. *et al.* In vivo genome editing using *Staphylococcus aureus* Cas9. *Nature* **520**, 186–91 (2015).
99. Kleinstiver, B. P. *et al.* Broadening the targeting range of *Staphylococcus aureus* CRISPR-Cas9 by modifying PAM recognition. *Nat. Biotechnol.* **33**, 1293–1298 (2015).
100. Esvelt, K. M. *et al.* Orthogonal Cas9 proteins for RNA-guided gene regulation and editing. *Nat. Methods* **10**, 1116–21 (2013).
101. Anders, C., Niewoehner, O., Duerst, A. & Jinek, M. Structural basis of PAM-dependent target DNA recognition by the Cas9 endonuclease. *Nature* **513**, 569–73 (2014).
102. Kim, E. *et al.* In vivo genome editing with a small Cas9 orthologue derived from *Campylobacter jejuni*. *Nat. Commun.* **8**, 14500 (2017).
103. Gao, L. *et al.* Engineered Cpf1 variants with altered PAM specificities. *Nat. Biotechnol.* **35**, 789–792 (2017).
